# Supplementary material for: Fluorescence Assay for the Determination of d-Panthenol Based on Novel Ring-Fused 2-Pyridone Derivative
Source: MDPI journal article supplement (doi:10.3390/ijms21218386), 2020-11-09
Supplement: s1 [file s1]

# SUPPLEMENTARY INFORMATION

## Fluorescence assay for the determination of D-panthenol based on novel ring-fused 2-pyridone derivative

Wiktor Kasprzyk<sup>a\*</sup>, Tomasz Świergosz<sup>b</sup>, Filip Koper<sup>a</sup>

<sup>1</sup> Department of Biotechnology and Physical Chemistry, Faculty of Chemical Engineering and Technology, Cracow University of Technology, Warszawska 24, 31-155 Kraków, Poland; wiktorkasprzyk@pk.edu.pl

<sup>2</sup> Department of Analytical Chemistry, Faculty of Chemical Engineering and Technology, Cracow University of Technology, Warszawska 24, 31-155 Kraków, Poland; tomasz.swiergosz@pk.edu.pl

\* Correspondence: wiktorkasprzyk@pk.edu.pl (W.K)

**Table S1.** Molar ratios for reactions of citric acid in glass vial reactors at 160 °C for 3 hours with DP (A), 3A1P (B), PAN (C).

| <b>A</b> | Molar ratio<br>CA:DP | Mass of CA<br>[mg] | Mass of DP<br>[mg] |
|----------|----------------------|--------------------|--------------------|
|          | 10:1                 | 451.76             | 48.24              |
|          | 6:1                  | 424.47             | 75.53              |
|          | 4:1                  | 394.66             | 105.34             |
|          | 2:1                  | 325.98             | 174.02             |
|          | 1:1                  | 241.81             | 258.19             |
|          | 1:2                  | 159.47             | 340.53             |
|          | 1:4                  | 94.86              | 405.14             |
|          | 1:6                  | 67.51              | 432.49             |
|          | 1:10                 | 42.82              | 457.18             |

  

| <b>B</b> | Molar ratio<br>CA:3A1P | Mass of CA<br>[mg] | Mass of 3A1P<br>[mg] |
|----------|------------------------|--------------------|----------------------|
|          | 10:1                   | 481.20             | 18.8                 |
|          | 6:1                    | 469.44             | 30.56                |
|          | 4:1                    | 455.52             | 44.48                |
|          | 2:1                    | 418.30             | 81.70                |
|          | 1:1                    | 359.55             | 140.45               |
|          | 1:2                    | 280.70             | 219.30               |
|          | 1:4                    | 195.12             | 304.88               |
|          | 1:6                    | 149.53             | 350.47               |
|          | 1:10                   | 101.91             | 398.09               |

  

| <b>C</b> | Molar ratio<br>CA:PAN | Mass of CA<br>[mg] | Mass of PAN<br>[mg] |
|----------|-----------------------|--------------------|---------------------|
|          | 10:1                  | 468.29             | 31.71               |
|          | 6:1                   | 449.30             | 50.70               |
|          | 4:1                   | 427.62             | 72.38               |
|          | 2:1                   | 373.54             | 126.46              |
|          | 1:1                   | 298.14             | 201.86              |
|          | 1:2                   | 212.39             | 287.61              |
|          | 1:4                   | 134.83             | 365.17              |
|          | 1:6                   | 98.77              | 401.23              |
|          | 1:10                  | 64.34              | 435.66              |

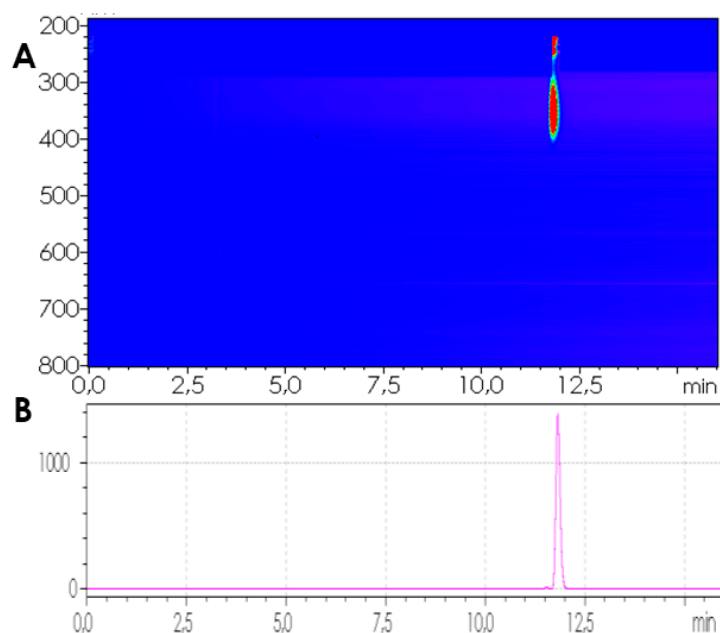

**Figure S1.** LC-DAD chromatogram of pure fluorophore separated from the reaction mixture (retention time: 11.8 min.) (A). LC chromatogram of the pure fluorophore calculated from a maximum plot of 190-800 nm (retention time: 11.8 min.) (B).

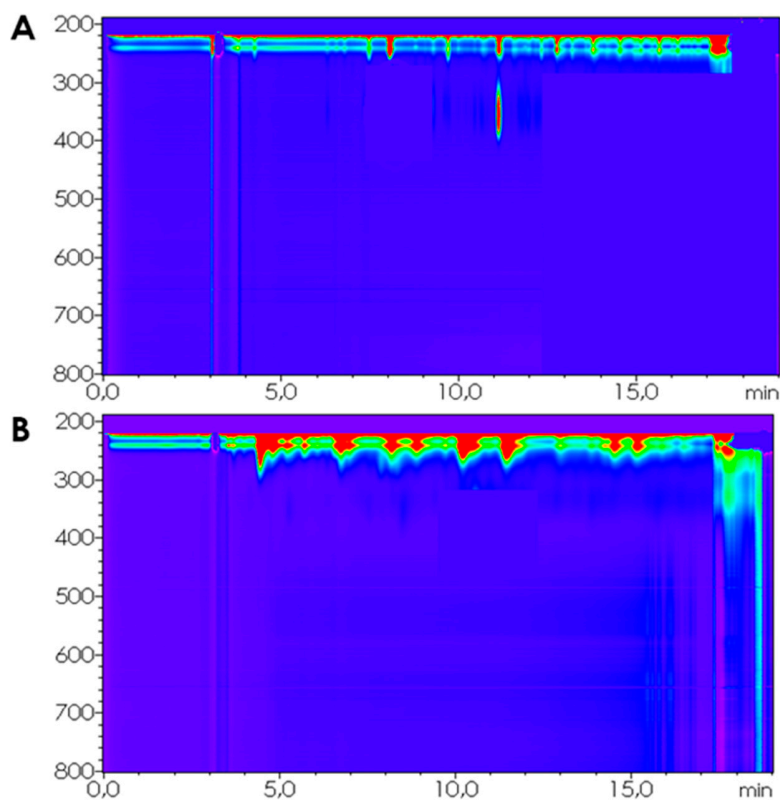

**Figure S2.** LC-DAD chromatogram of CA:3A1P reaction mixture (1:1 mol/mol, 160 °C, 180 min) (A). and LC-DAD chromatogram of CA:PAN reaction mixture (1:1 mol/mol, 160 °C, 180 min) (B).

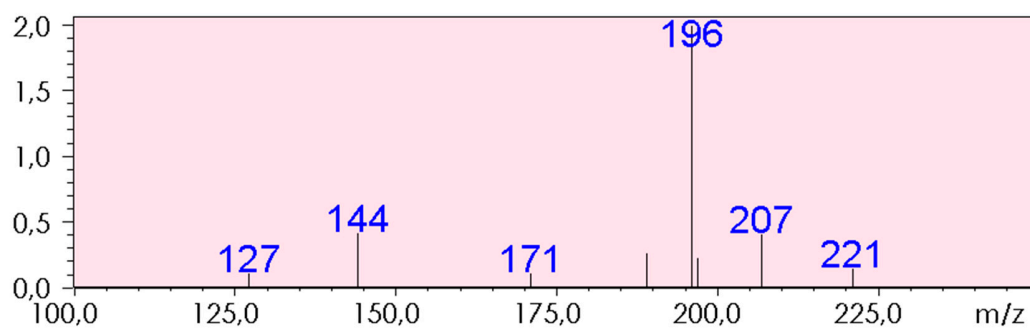

**Figure S3.** The mass spectrum of the fraction with a retention time of 11.8 minutes formed in a reaction with a molar ratio from CA:31AP 1:1.

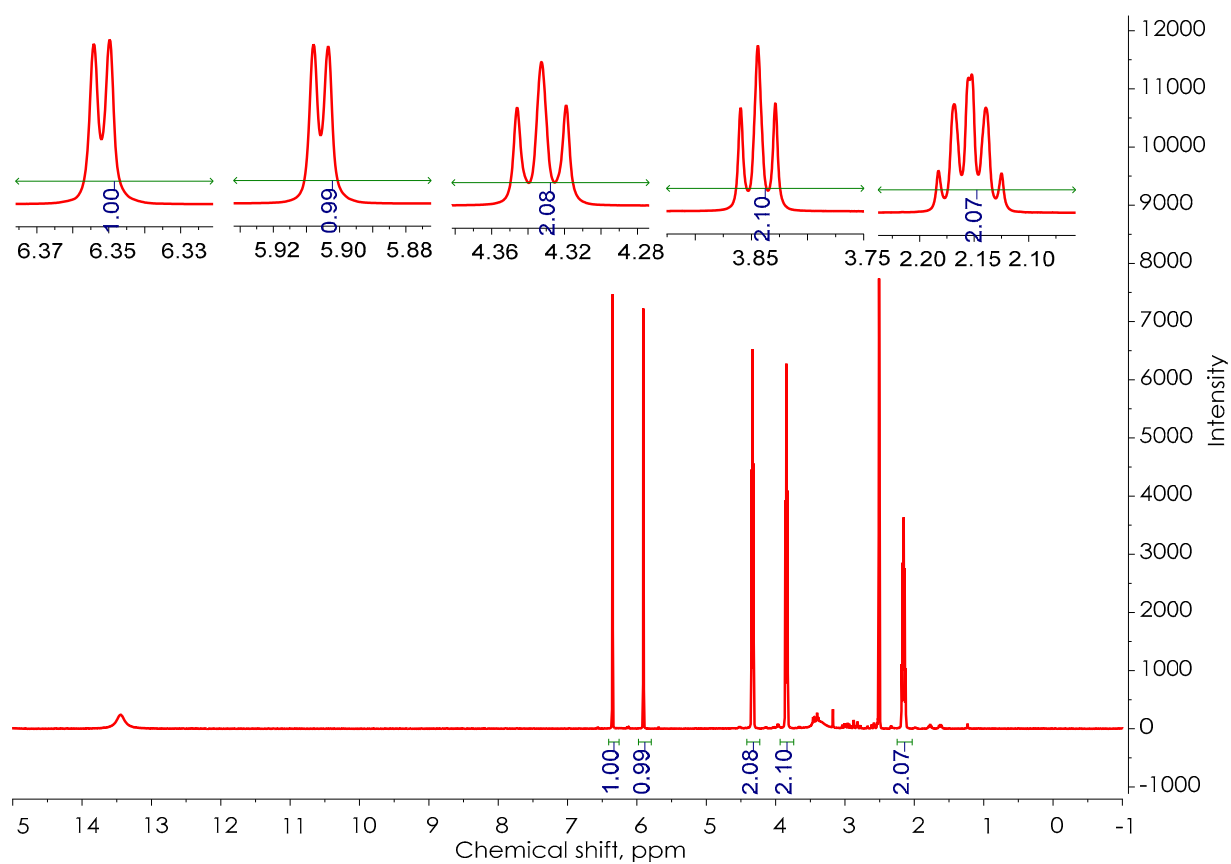

**Figure S4.** <sup>1</sup>H NMR of the fluorescent fraction.

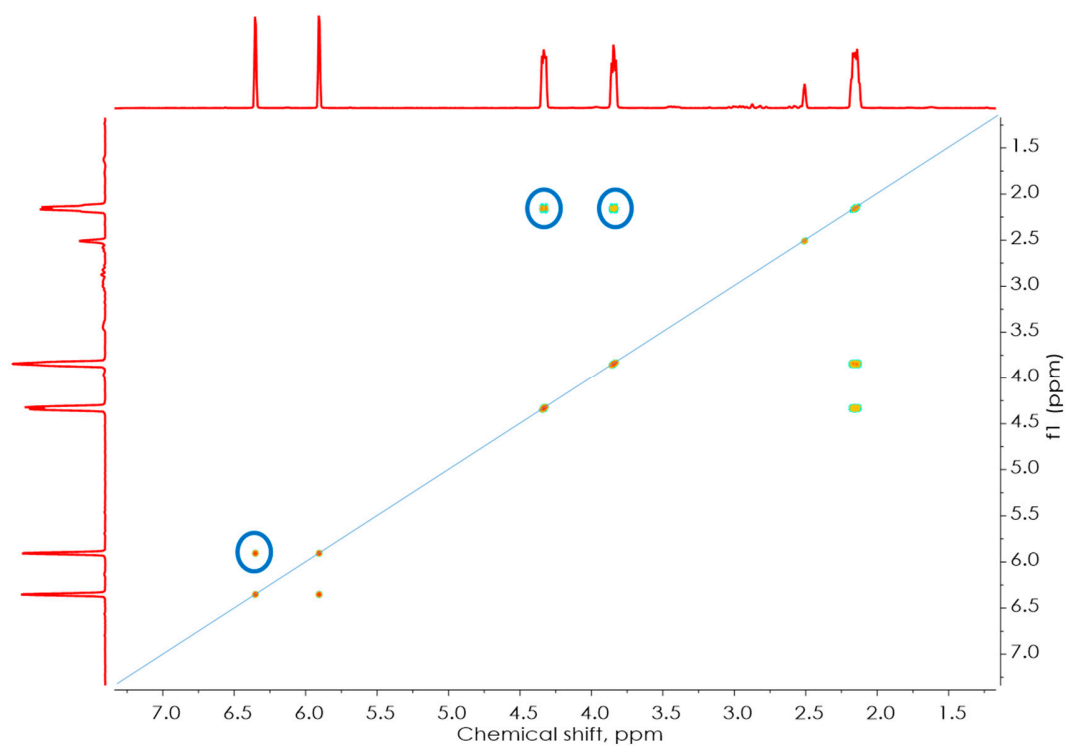

**Figure S5.**  $^1\text{H}$ - $^1\text{H}$  COSY NMR of the fluorescent fraction.

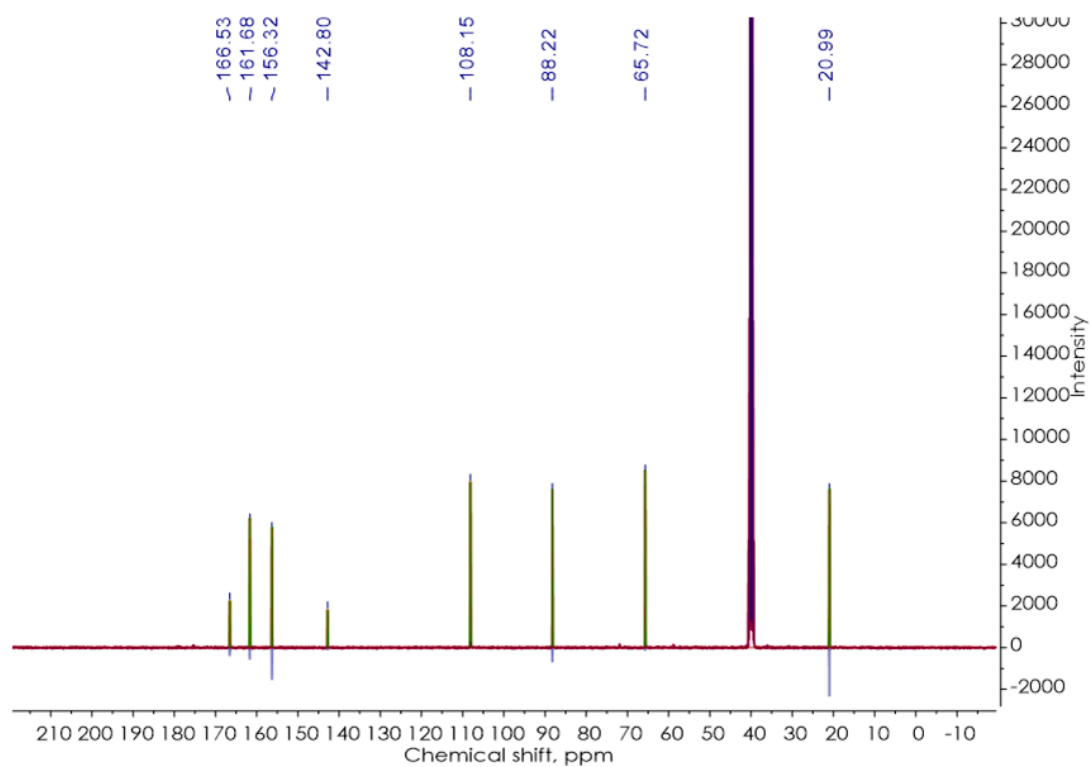

**Figure S6.**  $^{13}\text{C}$  NMR of the fluorescent fraction.

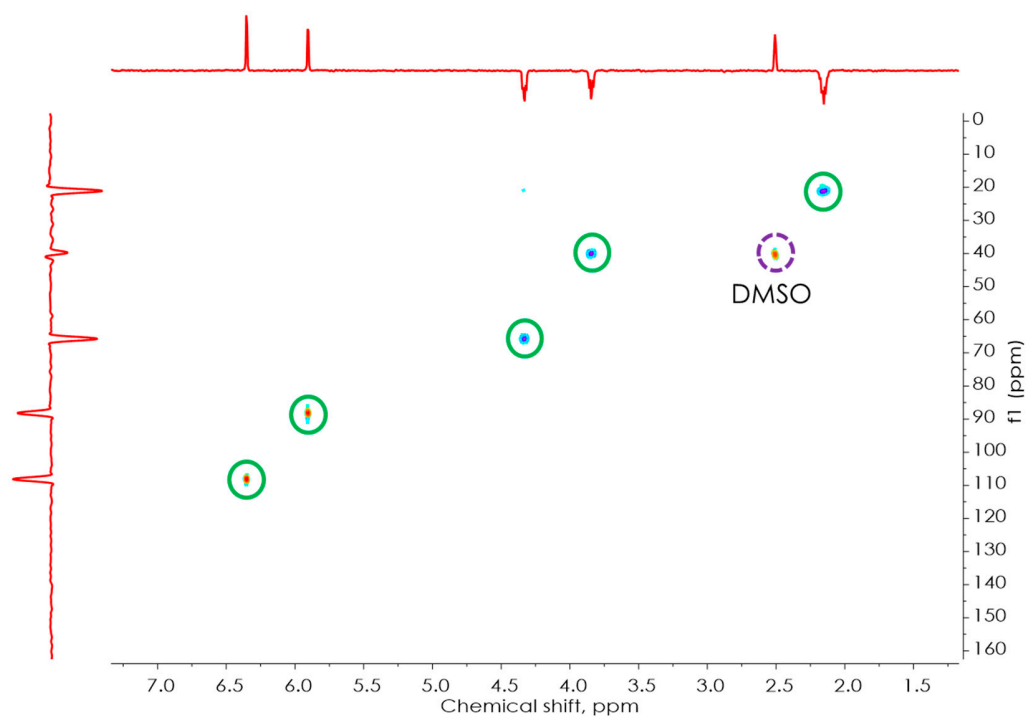

**Figure S7.**  $^1\text{H}$ - $^{13}\text{C}$  HSQC NMR of the fluorescent fraction.

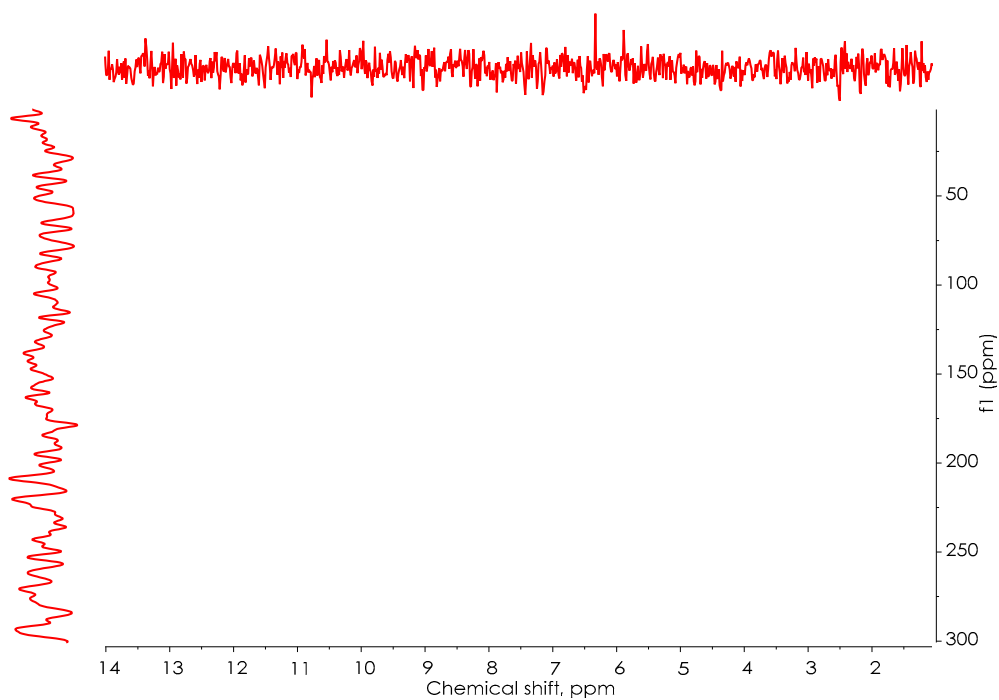

**Figure S8.**  $^1\text{H}$ - $^{15}\text{N}$  HSQC of the fluorescent fraction.

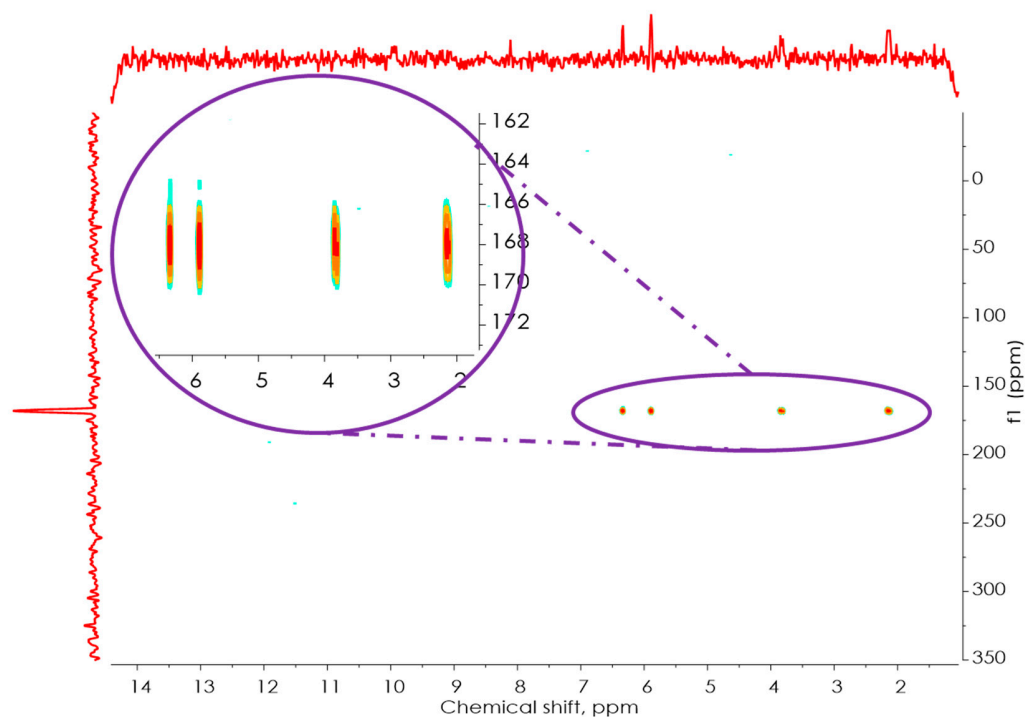

**Figure S9.**  $^1\text{H}$ - $^{15}\text{N}$  HMBC of the fluorescent fraction.

**Table S2.** Couplings between the atoms in  $^1\text{H}$ - $^{13}\text{C}$  HMBC NMR of the fluorescent fraction.

| No. | Chemical shift<br>(hydrogen) (ppm) | Chemical shift<br>(carbon) (ppm) | Distance<br>(number of bonds) |
|-----|------------------------------------|----------------------------------|-------------------------------|
| 1   | 6.35                               | 166.54                           | 3                             |
| 2   | 5.90                               | 166.54                           | 3                             |
| 3   | 6.35                               | 161.73                           | 2                             |
| 4   | 3.84                               | 161.73                           | 3                             |
| 5   | 6.35                               | 156.31                           | 4                             |
| 6   | 5.90                               | 156.31                           | 2                             |
| 7   | 4.33                               | 156.31                           | 3                             |
| 8   | 3.84                               | 156.31                           | 3                             |
| 9   | 6.35                               | 142.86                           | 2                             |
| 10  | 5.90                               | 142.86                           | 2                             |
| 11  | 3.84                               | 142.86                           | 5                             |
| 12  | 5.90                               | 108.14                           | 3                             |
| 13  | 6.35                               | 88.21                            | 3                             |
| 14  | 3.84                               | 65.65                            | 3                             |
| 15  | 2.14                               | 65.65                            | 2                             |
| 16  | 4.33                               | 40.25                            | 3                             |
| 17  | 2.14                               | 40.25                            | 2                             |
| 18  | 4.33                               | 20.95                            | 2                             |
| 19  | 3.84                               | 20.95                            | 2                             |

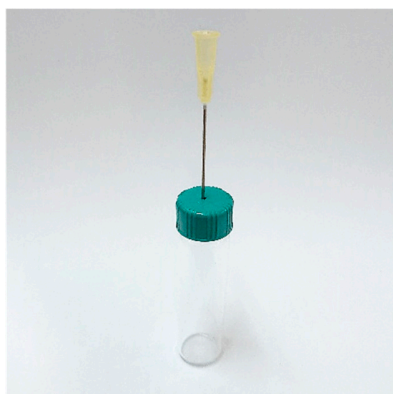

**Figure S10.** The type of vessel used in the process of panthenol derivatization.

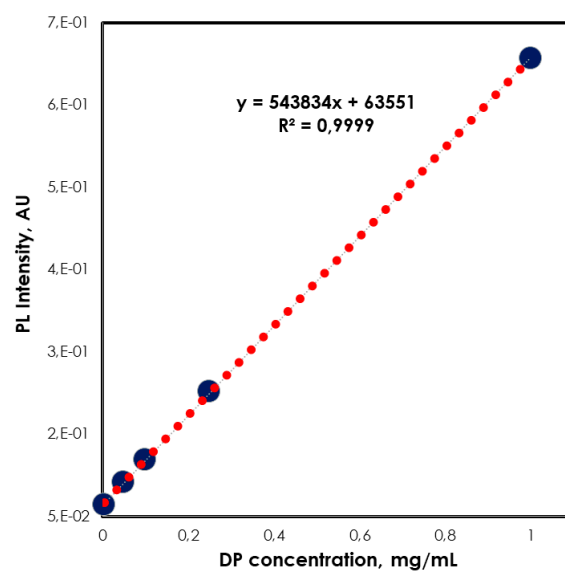

**Figure S11.** LC-MS calibration curve for the determination of panthenol in pharmaceutical formulations (calculated from the area under the curves).
